# Supplementary material for: Evaluation of Sample Preservation and Storage Methods for Metaproteomics Analysis of Intestinal Microbiomes
Source: PubMed Central journal article supplement (PMC8672883; doi:10.1128/spectrum.01877-21), 2021-12-15
Supplement: reviewer-comments.pdf [file reviewer-comments.pdf]

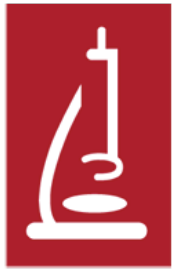

AMERICAN  
SOCIETY FOR  
MICROBIOLOGY

# Microbiology Spectrum

## Evaluation of sample preservation and storage methods for metaproteomics analysis of intestinal microbiomes

Angie Mordant and Manuel Kleiner

*Corresponding Author(s): Angie Mordant, North Carolina State University*

---

### Review Timeline:

Submission Date:

October 12, 2021

Accepted:

October 31, 2021

---

*Editor: Cezar Khursigara*

*Reviewer(s): The reviewers have opted to remain anonymous.*

### Transaction Report:

(Note: With the exception of the correction of typographical or spelling errors that could be a source of ambiguity, letters and reports are not edited. The original formatting of letters and referee reports may not be reflected in this compilation.)

**DOI:** <https://doi.org/10.1128/Spectrum.01877-21>

October 31, 2021

Ms. Angie Mordant  
North Carolina State University  
Plant & Microbial Biology  
4510 Thomas Hall  
112 Derieux Place  
Raleigh, NC 27695

Re: Spectrum01877-21 (Evaluation of sample preservation and storage methods for metaproteomics analysis of intestinal microbiomes)

Dear Ms. Angie Mordant:

Your manuscript has been accepted, and I am forwarding it to the ASM Journals Department for publication. You will be notified when your proofs are ready to be viewed.

The ASM Journals program strives for constant improvement in our submission and publication process. Please tell us how we can improve your experience by taking this quick [Author Survey](#).

As an open-access publication, Spectrum receives no financial support from paid subscriptions and depends on authors' prompt payment of publication fees as soon as their articles are accepted. You will be contacted separately about payment when the proofs are issued; please follow the instructions in that e-mail. Arrangements for payment must be made before your article is published. For a complete list of **Publication Fees**, including supplemental material costs, please visit our [website](#).

Corresponding authors may [join or renew ASM membership](#) to obtain discounts on publication fees. Need to upgrade your membership level? Please contact Customer Service at [Service@asmusa.org](mailto:Service@asmusa.org).

Thank you for submitting your paper to Spectrum.

Sincerely,

Cezar Khursigara  
Editor, Microbiology Spectrum

Journals Department  
American Society for Microbiology  
1752 N St., NW  
Washington, DC 20036  
E-mail: [spectrum@asmusa.org](mailto:spectrum@asmusa.org)

Supplemental Material: Accept

File S5: Accept

File S3: Accept

File S1: Accept

File S4: Accept

File S2: Accept
