# Supplementary material for: Evaluation of Sample Preservation and Storage Methods for Metaproteomics Analysis of Intestinal Microbiomes
Source: PubMed Central journal article supplement (PMC8672883; doi:10.1128/spectrum.01877-21), 2021-12-15
Supplement: spectrum01877-21_supp_1_seq1.pdf [file spectrum01877-21_supp_1_seq1.pdf]

# Supplementary information for “Evaluation of sample preservation and storage methods for metaproteomics analysis of intestinal microbiomes”

Angie Mordant<sup>1</sup>, Manuel Kleiner<sup>1</sup>

## Affiliations:

1. Department of Plant and Microbial Biology, North Carolina State University, Raleigh,  
NC, USA

## Correspondence:

Angie Mordant - [almordan@ncsu.edu](mailto:almordan@ncsu.edu)

Manuel Kleiner - [mkleine@ncsu.edu](mailto:mkleine@ncsu.edu)

## Additional file 1: Quantification data for identified proteins.

Data sheets containing quantitative data for all identified proteins (i) expressed as Peptide Spectrum Matches (PSMs), (ii) expressed as percent Normalized Spectral Abundance Factors (%NSAFs), and (iii) expressed as Centered-Log-Ratio (CLR) transformed values. **(XLSX 7 MB)**

## Additional file 2: Differentially abundant proteins.

Data sheet containing protein accessions,  $-\log(p\text{-value})$ , and fold difference for proteins that were significantly different between preservation methods (Student's T-test corrected for multiple hypothesis testing with a permutation-based FDR of 5%,  $S_0=0.1$ ). **(XLSX 142 KB)**

## Additional file 3: List of proteins detected per treatment and their corresponding molecular weights and isoelectric points. **(XLSX 3 MB)**

## Additional file 4: Number of predicted transmembrane domains for the proteins identified per treatment.

Data sheet displays the output of the TMHMM 2.0 Server [1] from searching sequences of the identified proteins. **(XLSX 1 MB)**

## Additional file 5: Measured microbiome composition in each treatment based on metaproteomes.

Taxonomic composition at the (i) phylum and at the (ii) genus level. **(XLSX 15 KB)**

35

## 36 SUPPLEMENTARY RESULTS

37 For each treatment, we plotted the relative abundance of each protein, expressed as percent Normalized  
38 Spectral Abundance Factors (%NSAFs, [2]) between every replicate pair of samples. This showed that  
39 within-treatment variability was low. Figures S1 - S6 are scatterplot matrices showing the linear  
40 correlations of replicates and the corresponding Pearson correlation coefficients. We prepared the plots in  
41 R (version 4.0.2; psych\_2.1.3 package).

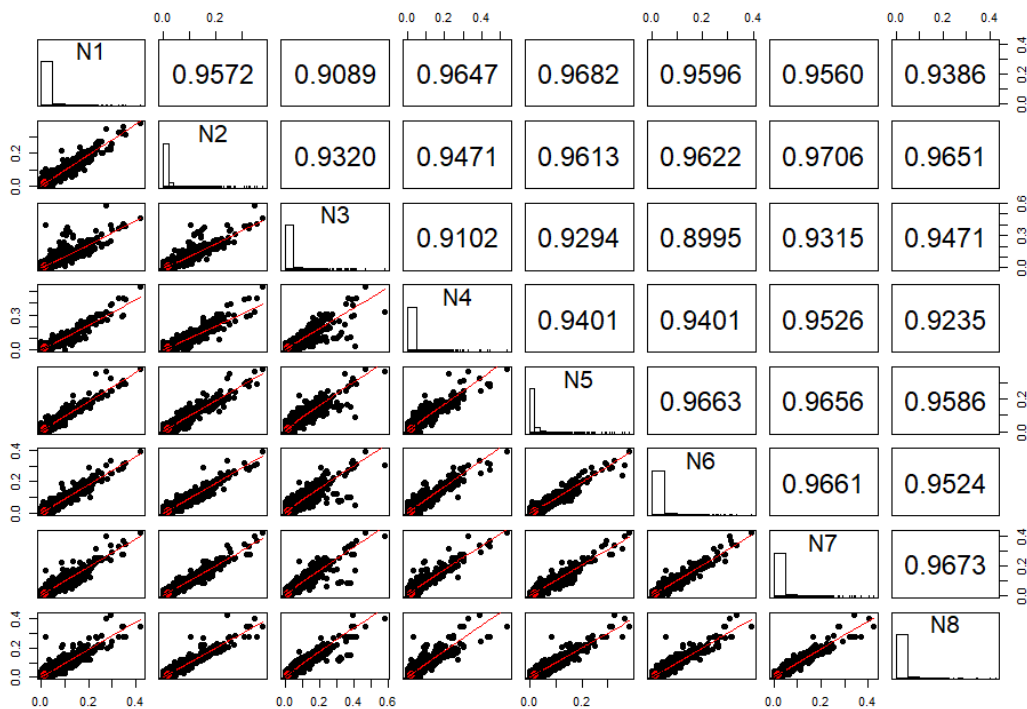

42

43 **Figure S1.** Linear correlation of NAP buffer (N) replicates. Plots are displayed in the lower panel and the  
44 corresponding Pearson correlation coefficients are displayed in the upper panel.

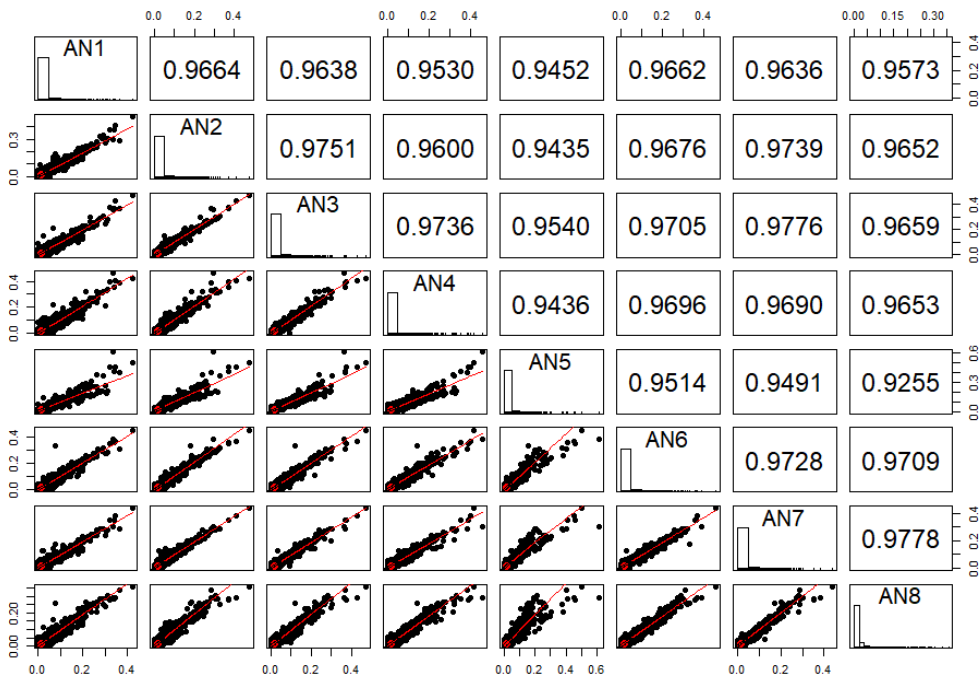

45

46 **Figure S2.** Linear correlation of Autoclaved NAP buffer (AN) replicates. Plots are displayed in the lower  
 47 panel and the corresponding Pearson correlation coefficients are displayed in the upper panel.

48

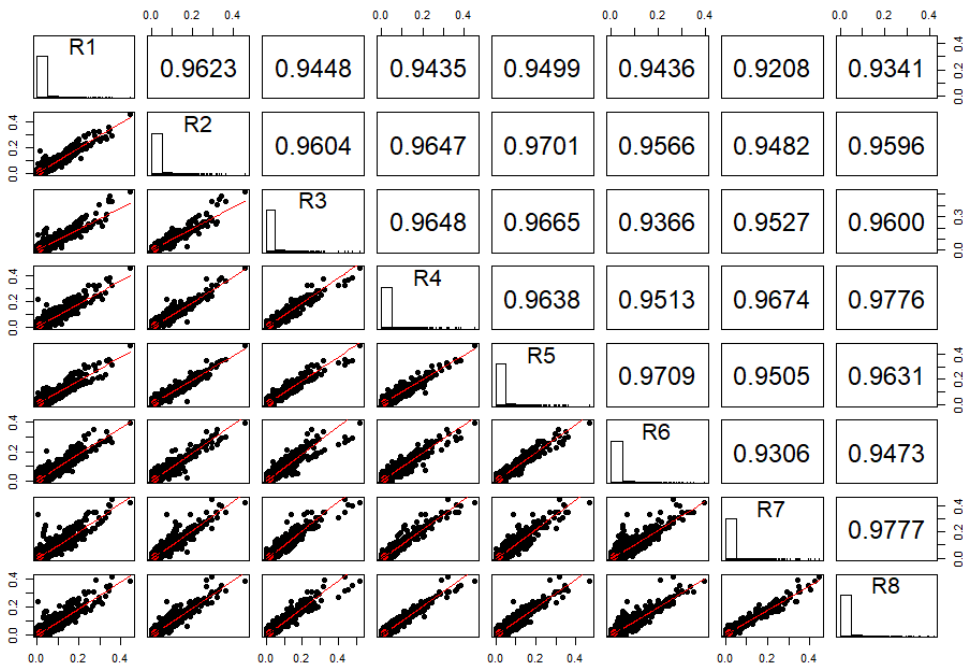

49

50 **Figure S3.** Linear correlation of RNAlater (R) replicates. Plots are displayed in the lower panel and the  
 51 corresponding Pearson correlation coefficients are displayed in the upper panel.

52

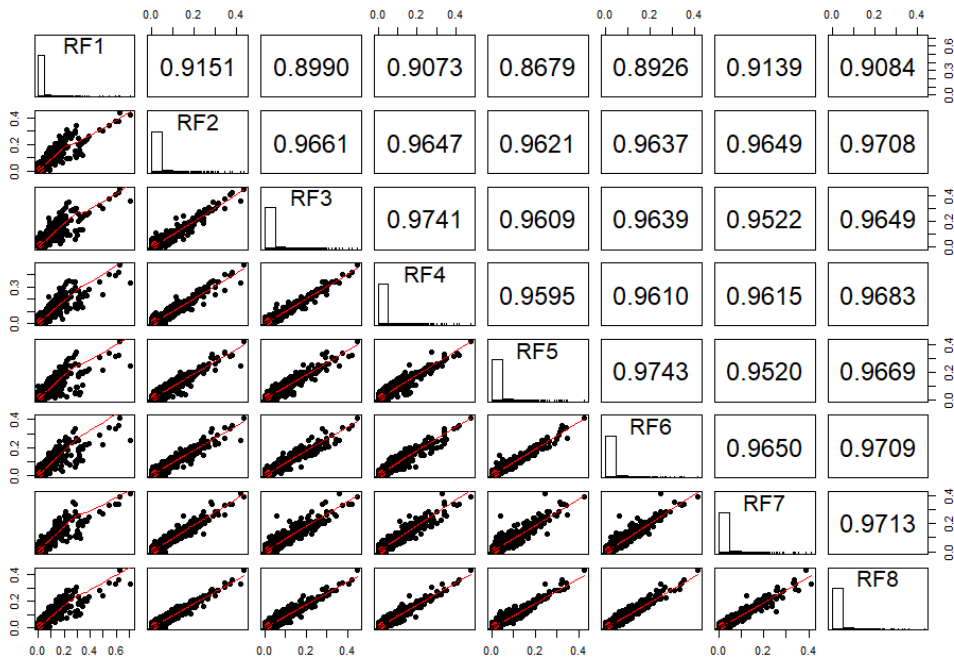

53

54 **Figure S4.** Linear correlation of RNAlater + flash-freezing (RF) replicates. Plots are displayed in the lower  
 55 panel and the corresponding Pearson correlation coefficients are displayed in the upper panel.

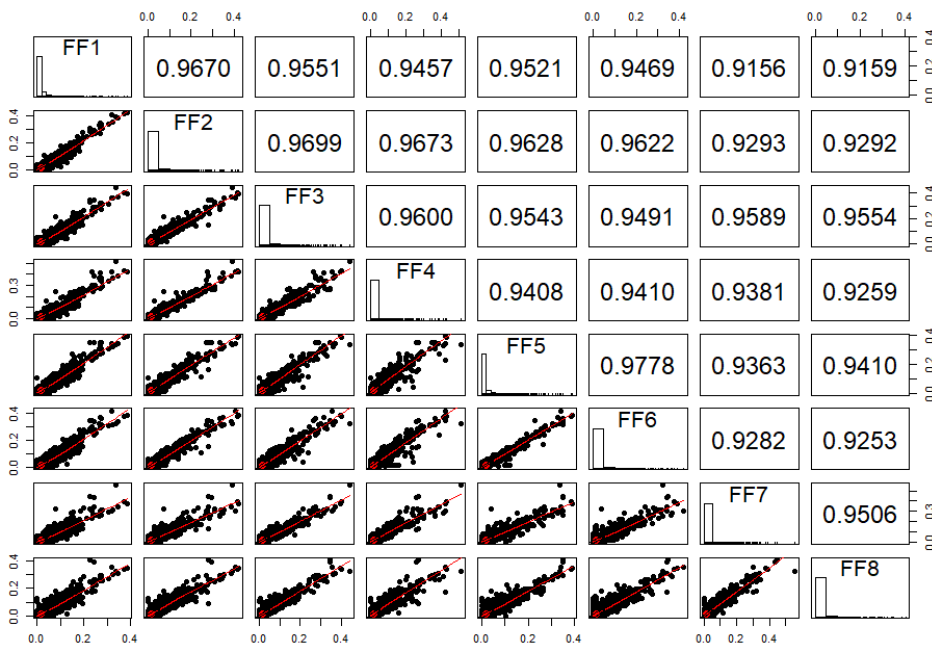

56

57 **Figure S5.** Linear correlation of Flash-frozen (FF) replicates. Plots are displayed in the lower panel and  
 58 the corresponding Pearson correlation coefficients are displayed in the upper panel.  
 59  
 60

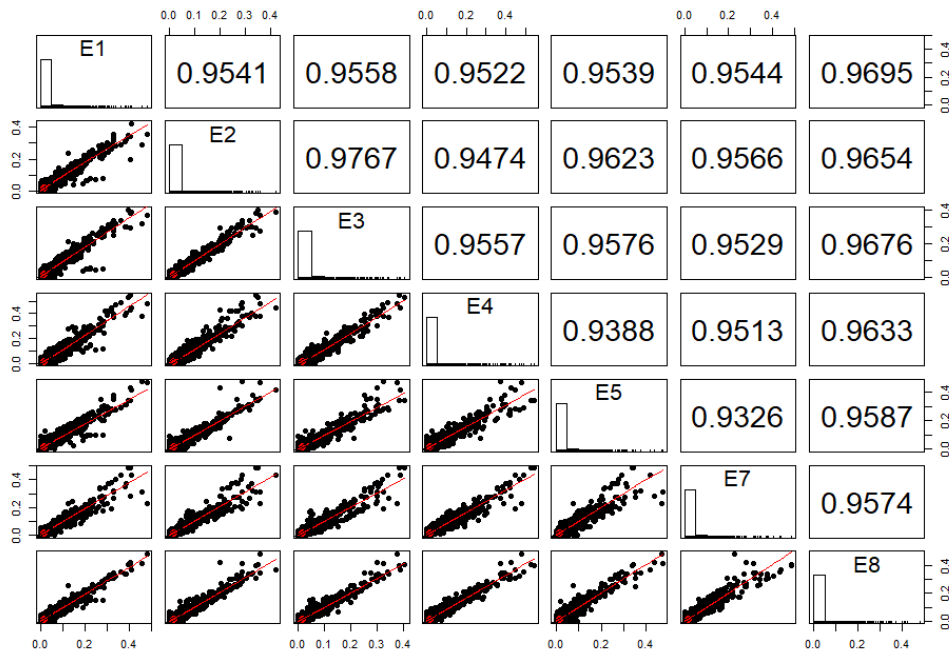

61

62 **Figure S6.** Linear correlation of ethanol (E) replicates. Plots are displayed in the lower panel and the  
 63 corresponding Pearson correlation coefficients are displayed in the upper panel.

64

65 We analyzed the metaproteome-based taxonomic compositions of individual samples using the method  
 66 described in [3]. Briefly, we filtered proteins to include only those with at least 2 protein unique peptides to  
 67 increase the confidence in taxonomic identifications, and we summed Peptide Spectrum Matches (PSMs)  
 68 by taxon; sums were then used to estimate the biomass contribution of each taxon in the metaproteomes.  
 69 This analysis showed that host proteins contributed 5.7 +/- 1.6% (n = 47) of each metaproteome, while  
 70 the microbial proteins contributed 94.2 +/- 1.6% (n = 47) and dietary proteins from wheat, the main  
 71 component of the mice's diet, contributed roughly 0.1 +/- 0.2 % (n = 47). Taxonomic profiles in terms of  
 72 biomass contribution were consistent across all replicates, with minor variability (as shown in Figure S7).  
 73 Figures S7 A and S7 B show the representation of the detected phyla in each sample. The phylum  
 74 Firmicutes was dominant in these samples, making up 86.7 +/- 0.92 % (n = 47) of the total proteinaceous  
 75 biomass. Microorganisms of unknown taxonomy made up 13.1 +/- 0.92 % (n = 47) of the total  
 76 proteinaceous biomass of the samples. The number of detected proteins of known taxonomy was higher  
 77 than expected given that only 67.8% of the microbial protein sequences in the database were assigned a

78 taxonomy at the phylum level and 9.8% of the microbial sequences were annotated to the genus level [4].  
 79 We found that 11.1 +/- 0.53 % (n = 47) of the total proteinaceous biomass in our samples had a taxonomy  
 80 assigned at the genus level, representing 28 microbial genera. Over half of these genera have very few  
 81 Peptide Spectrum Matches (PSMs). The most abundant genera detected in the samples included  
 82 *Clostridium*, *Eubacterium*, *Butyrivibrio*, *Lactobacillus*, *Turicibacter*, *Blautia*, *Roseburia*, and *Coprococcus*  
 83 (Figure S2 C).

84

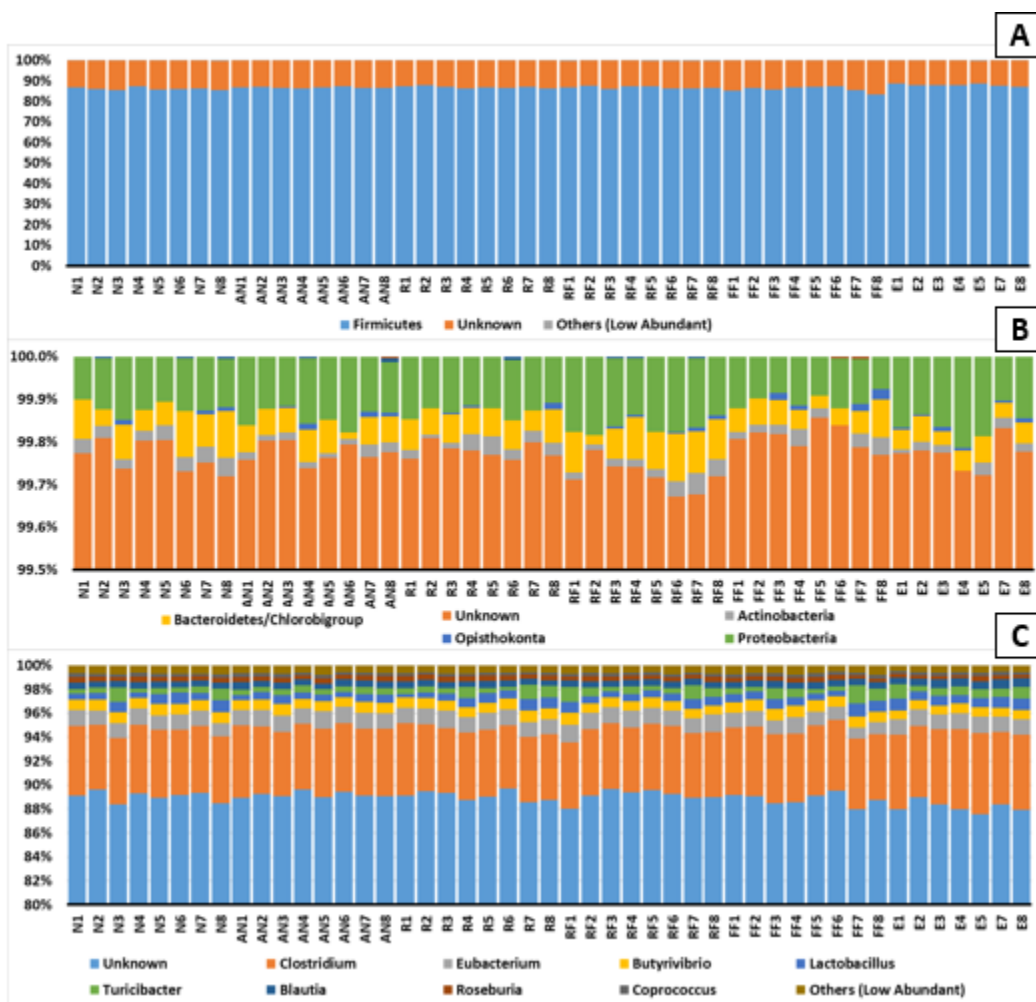

85  
 86 **Figure S7: Taxonomic composition of individual samples as proteinaceous biomass contribution.**  
 87 (A) Relative abundances of the major phyla: Firmicutes, Unknown, and Others. “Others” corresponds to  
 88 the sum of the phyla that were detected with very few Peptide Spectrum Matches (PSMs). The category  
 89 “Others” made up less than 0.4% of the total biomass contribution of the samples. (B) Relative  
 90 abundances of the lowly abundant phyla; i.e. composition of the category “others” shown in panel A. (C)

91 Relative abundances of the most abundant genera. N = NAP buffer; AN = Autoclaved NAP buffer; R =  
92 RNAlater; RF = RNAlater + Flash-freezing; FF = Flash-freezing; E = Ethanol.  
93

94

95 **Table S1:** Overview of the metaproteomic data provided with this study (dataset PXD024115 on the  
96 ProteomeXchange Consortium).  
97

| Sample name | Treatment             | Storage time | Peptide concentration (ng/uL) | Peptide load (ng) | Gradient length (min) |
|-------------|-----------------------|--------------|-------------------------------|-------------------|-----------------------|
| AN1         | Autoclaved NAP buffer | 1 week       | 542.81                        | 600               | 140                   |
| AN2         | Autoclaved NAP buffer | 1 week       | 551.851                       | 600               | 140                   |
| AN3         | Autoclaved NAP buffer | 1 week       | 694.574                       | 600               | 140                   |
| AN4         | Autoclaved NAP buffer | 1 week       | 366.24                        | 600               | 140                   |
| AN5         | Autoclaved NAP buffer | 4 weeks      | 904.853                       | 600               | 140                   |
| AN6         | Autoclaved NAP buffer | 4 weeks      | 473.039                       | 600               | 140                   |
| AN7         | Autoclaved NAP buffer | 4 weeks      | 703.288                       | 600               | 140                   |
| AN8         | Autoclaved NAP buffer | 4 weeks      | 533.189                       | 600               | 140                   |
| E1          | 95% Ethanol           | 1 week       | 261.009                       | 600               | 140                   |
| E2          | 95% Ethanol           | 1 week       | 439.121                       | 600               | 140                   |
| E3          | 95% Ethanol           | 1 week       | 391.333                       | 600               | 140                   |
| E4          | 95% Ethanol           | 1 week       | 143.315                       | 600               | 140                   |
| E5          | 95% Ethanol           | 4 weeks      | 461.439                       | 600               | 140                   |
| E6          | 95% Ethanol           | 4 weeks      | 191.788                       | 600               | 140                   |
| E7          | 95% Ethanol           | 4 weeks      | 329.92                        | 600               | 140                   |
| E8          | 95% Ethanol           | 4 weeks      | 325.898                       | 600               | 140                   |
| FF1         | Flash Freezing        | 1 week       | 609.099                       | 600               | 140                   |
| FF2         | Flash Freezing        | 1 week       | 671.558                       | 600               | 140                   |
| FF3         | Flash Freezing        | 1 week       | 461.606                       | 600               | 140                   |

|     |                           |         |         |     |     |
|-----|---------------------------|---------|---------|-----|-----|
| FF4 | Flash Freezing            | 1 week  | 628.12  | 600 | 140 |
| FF5 | Flash Freezing            | 4 weeks | 283.113 | 600 | 140 |
| FF6 | Flash Freezing            | 4 weeks | 228.295 | 600 | 140 |
| FF7 | Flash Freezing            | 4 weeks | 253.664 | 600 | 140 |
| FF8 | Flash Freezing            | 4 weeks | 237.902 | 600 | 140 |
| N1  | NAP buffer                | 1 week  | 607.684 | 600 | 140 |
| N2  | NAP buffer                | 1 week  | 587.895 | 600 | 140 |
| N3  | NAP buffer                | 1 week  | 599.197 | 600 | 140 |
| N4  | NAP buffer                | 1 week  | 841.462 | 600 | 140 |
| N5  | NAP buffer                | 4 weeks | 608.211 | 600 | 140 |
| N6  | NAP buffer                | 4 weeks | 543.518 | 600 | 140 |
| N7  | NAP buffer                | 4 weeks | 634.832 | 600 | 140 |
| N8  | NAP buffer                | 4 weeks | 490.3   | 600 | 140 |
| R1  | RNAlater                  | 1 week  | 694.166 | 600 | 140 |
| R2  | RNAlater                  | 1 week  | 633.792 | 600 | 140 |
| R3  | RNAlater                  | 1 week  | 871.938 | 600 | 140 |
| R4  | RNAlater                  | 1 week  | 555.872 | 600 | 140 |
| R5  | RNAlater                  | 4 weeks | 649.313 | 600 | 140 |
| R6  | RNAlater                  | 4 weeks | 508.285 | 600 | 140 |
| R7  | RNAlater                  | 4 weeks | 333.275 | 600 | 140 |
| R8  | RNAlater                  | 4 weeks | 563.871 | 600 | 140 |
| RF1 | RNAlater + Flash Freezing | 1 week  | 665.051 | 600 | 140 |
| RF2 | RNAlater + Flash Freezing | 1 week  | 413.117 | 600 | 140 |
| RF3 | RNAlater + Flash Freezing | 1 week  | 375.914 | 600 | 140 |
| RF4 | RNAlater + Flash Freezing | 1 week  | 521.545 | 600 | 140 |
| RF5 | RNAlater + Flash Freezing | 4 weeks | 479.529 | 600 | 140 |
| RF6 | RNAlater + Flash Freezing | 4 weeks | 525.108 | 600 | 140 |



|     |                           |         |         |     |     |
|-----|---------------------------|---------|---------|-----|-----|
| RF7 | RNAlater + Flash Freezing | 4 weeks | 390     | 600 | 140 |
| RF8 | RNAlater + Flash Freezing | 4 weeks | 568.535 | 600 | 140 |

98 1. Krogh A, Larsson B, von Heijne G, Sonnhammer ELL. Predicting transmembrane protein topology with  
99 a hidden Markov model: application to complete genomes. *J Mol Biol.* 2001;305:567–80.  
100  
101 2. Zybailov B, Mosley AL, Sardi ME, Coleman MK, Florens L, Washburn MP. Statistical Analysis of  
102 Membrane Proteome Expression Changes in *Saccharomyces cerevisiae*. *J Proteome Res.* 2006;5:2339–  
103 47.  
104  
105 3. Kleiner M, Thorson E, Sharp CE, Dong X, Liu D, Li C, et al. Assessing species biomass contributions in  
106 microbial communities via metaproteomics. *Nat Commun.* 2017;8:1558.  
107  
108 4. Xiao L, Feng Q, Liang S, Sonne SB, Xia Z, Qiu X, et al. A catalog of the mouse gut metagenome. *Nat*  
109 *Biotechnol.* 2015;33:1103–8.  
110
